# Supplementary material
Source: PubMed Central journal article supplement (PMC4794023)
Supplement: valc021850.wt1_default.pdf [file valc021850.wt1_default.pdf]

**Web table 1. Examples of statements from clinical guidelines attributable to IPD meta-analyses**

| IPD publication <sup>1</sup>                                          | The IPD meta-analysis         | The matched guideline                                                                                                                                                                            | Pertinent result(s) of the IPD meta-analysis                                                                                                                                                                                                                                                                                                                              | Statement(s) from matched guideline based on IPD meta-analysis                                                                                                                                                                                                                                                                                                                                                                                                                                                                                                    |
|-----------------------------------------------------------------------|-------------------------------|--------------------------------------------------------------------------------------------------------------------------------------------------------------------------------------------------|---------------------------------------------------------------------------------------------------------------------------------------------------------------------------------------------------------------------------------------------------------------------------------------------------------------------------------------------------------------------------|-------------------------------------------------------------------------------------------------------------------------------------------------------------------------------------------------------------------------------------------------------------------------------------------------------------------------------------------------------------------------------------------------------------------------------------------------------------------------------------------------------------------------------------------------------------------|
| Early Breast Cancer Trialists' Collaborative Group 2010 <sup>18</sup> | 4 trials;<br>3729 patients    | 2012. International Society of Geriatric Oncology (SIOG) and European Society of Breast Cancer Specialists (EUSOMA). Management of elderly patients with breast cancer: updated recommendations. | <p>Radiotherapy reduced the absolute 10-year risk of any ipsilateral breast event regardless of age at diagnosis, extent of surgery, use of tamoxifen margin status, grade or tumour size</p> <p>Proportional reduction in ipsilateral breast events was greater in older than in younger women</p> <p>No significant effect on mortality after 10 years of follow-up</p> | <p>“A meta-analysis confirmed significant benefit from adjuvant radiotherapy plus breast-conserving surgery (BCS) over BCS alone in women older than 50 years (10-year local recurrence rate [LRR] 10·8% vs 27·8%, respectively)”</p> <p>“The proportional benefit in reduced breast events in the adjuvant radiotherapy group increased significantly with age in 10-year cohorts including 60–69 years and 70 years or older (p=0·02).”</p> <p>“Despite lower LRR with radiotherapy, randomised trials have not shown a survival benefit from radiotherapy“</p> |
| Piccart-Gebhart <i>et al.</i> 2008 <sup>21</sup>                      | 11 trials;<br>3953 patients   | 2010 National Breast and Ovarian Cancer Centre - Govt of Australia. Recommendations for use of Chemotherapy for the treatment of advanced breast cancer                                          | Taxanes were similar in terms of response rates and survival, but significantly worse than single-agent anthracyclines in terms of progression-free survival                                                                                                                                                                                                              | <p>“Single-agent taxanes are an alternative to anthracyclines for first-line treatment for women with advanced breast cancer;</p> <p>“Single-agent taxanes give similar response rates and overall survival, but shorter time to progression compared with anthracyclines”</p>                                                                                                                                                                                                                                                                                    |
| Baujat <i>et al.</i> 2010 <sup>26</sup>                               | 15 trials;<br>6515 patients   | *2013. National Comprehensive Cancer Center Guidelines Version 1.2013. Head and Neck Cancers                                                                                                     | <p>Altered fractionation increases tumour control and survival, compared with conventional radiotherapy. Hyperfractionation provides the greatest benefit</p> <p>Effect more pronounced in younger patients and those with good performance status</p>                                                                                                                    | <p>“A meta-analysis of updated individual patient data from 15 randomized trials analyzing the effect of hyperfractionated or accelerated radiotherapy on survival of patients with H&amp;N cancer has been published. Standard fractionation constituted the control arm in all of the trials in this meta- analysis. An absolute survival benefit of 3.4% at 5 years (HR 0.92; 95% CI, 0.86-0.97; P=.003) was reported.”</p> <p>“This benefit, however, was limited to patients younger than 60 years of age”</p>                                               |
| Pignon <i>et al.</i> 2009 <sup>27</sup>                               | 87 trials;<br>16,485 patients | 2011. British Association of Otorhinolaryngology. Head and Neck Cancer                                                                                                                           | <p>Benefit of concomitant chemoradiotherapy was confirmed, and was greater than the benefit of induction chemotherapy</p> <p>There was a decreasing effect of chemotherapy with age</p>                                                                                                                                                                                   | <p>“Concurrent chemoradiotherapy is at present the standard of care for treatment of locally advanced head and neck cancer, with a confirmed survival benefit.”</p> <p>“Elderly patients benefit least in terms of survival advantage with the use of concurrent chemotherapy.”</p>                                                                                                                                                                                                                                                                               |

<sup>1</sup> Details of patients/interventions given in Table 1

| IPD publication <sup>1</sup>                                            | The IPD meta-analysis                                                                                                                            | The matched guideline                                                                                                                                                                               | Pertinent result(s) of the IPD meta-analysis                                                                                                                                                                                                                                                      | Statement(s) from matched guideline based on IPD meta-analysis                                                                                                                                                                                                                                                                                                                                                  |
|-------------------------------------------------------------------------|--------------------------------------------------------------------------------------------------------------------------------------------------|-----------------------------------------------------------------------------------------------------------------------------------------------------------------------------------------------------|---------------------------------------------------------------------------------------------------------------------------------------------------------------------------------------------------------------------------------------------------------------------------------------------------|-----------------------------------------------------------------------------------------------------------------------------------------------------------------------------------------------------------------------------------------------------------------------------------------------------------------------------------------------------------------------------------------------------------------|
| Greb <i>et al.</i> 2008 <sup>28</sup>                                   | 15 trials;<br>3079 patients                                                                                                                      | 2011 Alberta Health Services. Alberta Bone Marrow and Blood Cell Transplant Program: Standard Practice Manual                                                                                       | No evidence that high dose chemotherapy improves overall survival<br><br>Some evidence that survival was worse for “good risk” patients<br>Suggestive but inconclusive, evidence that “poor risk” patients may benefit from high dose chemotherapy                                                | “The results of this meta-analysis demonstrated that HDCT does not improve OS (HR 1.05, 95% CI 0.92-1.19) compared with conventional chemotherapy”<br><br>“However, subgroup analysis for OS indicated different effects (p=0.032) for good (HR 1.46, 95% CI 1.02-2.09) and poor risk (HR 0.95, 95% CI 0.81-1.11) patients”                                                                                     |
| Auperin <i>et al.</i> 2010 <sup>29</sup>                                | 6 trials;<br>1205 patients                                                                                                                       | 2010. European Society for Medical Oncology. Early stage and locally advanced (non-metastatic) non-small-cell lung cancer: ESMO Clinical Practice Guidelines for diagnosis, treatment and follow-up | Concomitant chemoradiotherapy has a more beneficial effect on survival compared with sequential chemoradiotherapy<br><br>No clear evidence that any subgroups of patients benefited more or less from concomitant chemoradiotherapy in terms of progression-free or overall survival              | “Concomitant chemoradiotherapy at systemic doses results in superior outcome to sequential chemoradiotherapy... — and is considered the present standard of care in selected patients”.<br><br>"...the effect was observed to be independent of patient and tumour characteristics, substage (IIIA versus IIIB) and time period in which the trials were conducted"                                             |
| Bejan-Angoulvant <i>et al.</i> 2010 <sup>33</sup>                       | 8 trials;<br>6701 patients                                                                                                                       | 2011. NICE guideline. CG127: Hypertension. The clinical management of primary hypertension in adults                                                                                                | Treating hypertension in very old patients reduces stroke and heart failure with no effect on total mortality<br><br>In patients over 80 years old, the most reasonable strategy is a thiazide diuretic as first-line therapy and a maximal anti-hypertensive therapy with two drugs in low doses | “Offer antihypertensive drug treatment to people of any age with stage 2 hypertension.”<br><br>“...data in the MA came from either sub-group analyses of RCTs (data from only the ≥80 year-old people in the trial), or from RCTs in which only people ≥80 years were enrolled.”                                                                                                                                |
| Cholesterol Treatment Trialists’ (CTT) Collaboration 2010 <sup>35</sup> | 1. More versus less intensive statin regimens:<br>5 trials;<br>39,612 patients<br><br>2. Statin versus control<br>21 trials;<br>129,526 patients | *2010. <i>Canadian Stroke Network. Prevention of stroke. In: Canadian best practice recommendations for stroke care</i>                                                                             | In a wide range of people, statins reduce the risk of major vascular events (heart attacks, strokes and coronary revascularisation procedures) by about one fifth for each 1 mmol/L reduction in LDL cholesterol                                                                                  | “ <i>The Cholesterol Treatment Trialists meta-analysis of 14 statin trials showed a dose-dependent relative reduction in cardiovascular disease with low-density lipoprotein cholesterol lowering. Every 1.0 mmol/L reduction in low-density lipoprotein cholesterol is associated with a corresponding 20 to 25 percent reduction in cardiovascular disease mortality and nonfatal myocardial infarction</i> ” |

| IPD publication <sup>1</sup>                                     | The IPD meta-analysis                                                                                      | The matched guideline                                                                                                                                                                                              | Pertinent result(s) of the IPD meta-analysis                                                                                                                                                                                                                                                | Statement(s) from matched guideline based on IPD meta-analysis                                                                                                                                                                                                                                             |
|------------------------------------------------------------------|------------------------------------------------------------------------------------------------------------|--------------------------------------------------------------------------------------------------------------------------------------------------------------------------------------------------------------------|---------------------------------------------------------------------------------------------------------------------------------------------------------------------------------------------------------------------------------------------------------------------------------------------|------------------------------------------------------------------------------------------------------------------------------------------------------------------------------------------------------------------------------------------------------------------------------------------------------------|
|                                                                  |                                                                                                            | <i>2012 American College of Cardiology Foundation guideline for the diagnosis and management of patients with stable ischemic heart disease</i>                                                                    | Further reductions in LDL cholesterol with high-dose statins safely produce further definite reductions in major vascular events.                                                                                                                                                           | <i>"Class 1: In addition to therapeutic lifestyle changes, a moderate or high dose of a statin therapy should be prescribed, in the absence of contraindications or documented adverse effects. (Level of Evidence: A)"</i>                                                                                |
| Antithrombotic Trialists' (ATT) Collaboration 2009 <sup>36</sup> | 1. Primary prevention: 6 trials; 95,000 patients<br><br>2. Secondary prevention 16 trials; 17,000 patients | *2010 national Stroke Foundation. <i>Secondary prevention. In: Clinical Guidelines for Stroke Management 2010</i><br><br>*2010. National Institute for Clinical Excellence <i>CG94: Unstable Angina and NSTEMI</i> | In secondary prevention trials, aspirin allocation yielded a greater absolute reduction in serious vascular events<br><br>In both primary and secondary prevention trials, the proportional reductions in the aggregate of all serious vascular events seemed similar for men and for women | <i>"Long-term antiplatelet therapy should be prescribed to all people with ischaemic stroke or TIA who are not prescribed anticoagulation therapy"</i><br><br><i>"Aspirin therapy reduces the risk of a vascular event and should be offered to all patients with UA or NSTEMI unless contraindicated"</i> |
| O'Meara <i>et al.</i> 2009 <sup>50</sup>                         | 7 trials; 887 patients                                                                                     | 2010 Scottish Intercollegiate Guidelines Network. SIGN120: Management of chronic venous leg ulcers. A national clinical guideline                                                                                  | Venous leg ulcers in patients treated with four layer bandages heal faster, on average, than those of people treated with the short stretch bandage                                                                                                                                         | <i>"A meta-analysis of RCTs with pooling of individual patient data from five trials comparing 4LB with short stretch bandage found that the 4LB was associated with a significantly shorter time to healing."</i>                                                                                         |

\* Guideline cites an alternative publication of the same meta-analysis
