# Supplementary material
Source: PubMed Central journal article supplement (PMC4794023)
Supplement: valc021850.ww1_default.pdf [file valc021850.ww1_default.pdf]

## Web appendix 1: List of all guideline development groups matched with an eligible IPD meta-analysis (n=43)

1. Alberta Health Services (Canada)
2. American Association of Clinical Endocrinologists
3. American College of Cardiology Foundation/American Heart Association
4. American College of Chest Physicians
5. American College of Radiologists
6. American Medical Directors Association
7. American Society for Blood and Marrow Transplantation
8. American Society for Gastrointestinal Endoscopy
9. American Society of Clinical Oncology
10. Association for the Advancement of Wound Care
11. Belgian Healthcare Knowledge Center
12. Breast Health Global Initiative
13. British Association of Otorhinolaryngology
14. British Thoracic Society
15. Canadian Stroke Network
16. Catalan Cancer Strategy
17. European Group for Bone and Marrow Transplantation/ European Oncology Nursing Society
18. European Society for Medical Oncology
19. European Society of Breast Cancer Specialists
20. Finnish Medical Society Duodecim
21. German AGO (Arbeitsgemeinschaft Gynaekologische Onkologie)
22. German Cancer Society
23. German Respiratory Society
24. Global Initiative for Asthma
25. Heart Failure Society of America
26. Infectious Diseases Society of America
27. Institute for Clinical Systems Improvement (USA)
28. International Society of Geriatric Oncology
29. Malaysian Ministry of Health
30. Michigan Quality Improvement Consortium
31. National Breast and Ovarian Cancer Centre (Australia)
32. National Comprehensive Cancer Network (USA)
33. National Institute for Clinical Excellence (UK)
34. National Stroke Foundation (Australia)
35. Saskatchewan Cancer Agency
36. Scottish Intercollegiate Guideline Network
37. Society of Thoracic Surgeons (International)
38. Spanish Society of Medical Oncology
39. St. Gallen International Expert Consensus on the Primary Therapy of Early Breast Cancer (Europe)
40. University of Michigan Health System
41. University of Texas at Austin (USA)
42. Veterans Affairs/Department of Defense
43. Wound, Ostomy, and Continence Nurses Society
