# Supplementary material
Source: PubMed Central journal article supplement (PMC4794023)

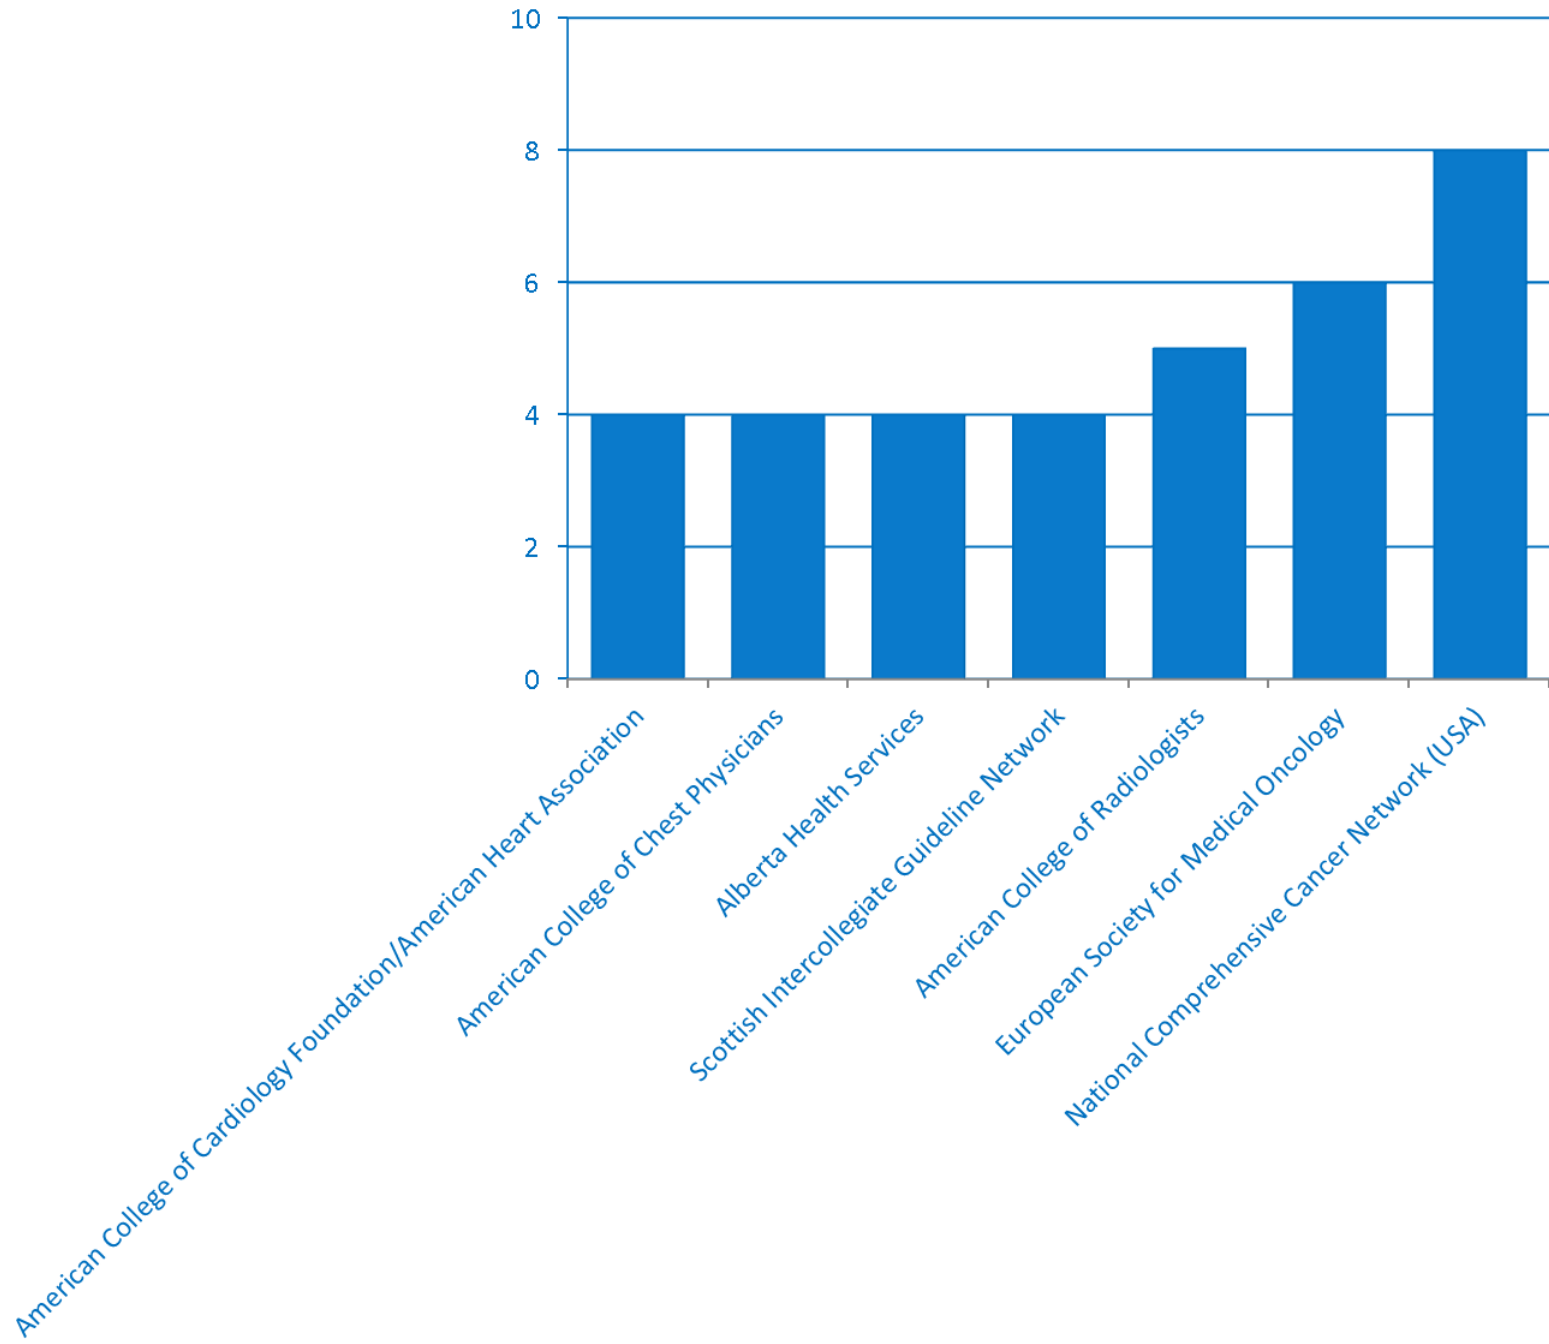

Supplement: valc021850.wf1_default.pdf [file valc021850.wf1_default.pdf]
